# Supplementary material
Source: publisher figshare collection journal article supplement (https://brill.figshare.com/ndownloader/files/22246767)
Supplement: Supplementary file 1 [file 22246767]

Behavioural and physiological responses to simulated predator-induced stress in the eastern box turtle, *Terrapene carolina carolina*

Victoria L. Preston<sup>1</sup>, Jessica M. Vannatta<sup>2</sup>, Matthew Klukowski<sup>1,\*</sup>

1 – Middle Tennessee State University, Department of Biology, Murfreesboro, Tennessee, 37132, USA

2 – Hungry Valley State Vehicular Recreation Area, California Department of Parks and Recreation, Gorman, California, 93243, USA

\*Corresponding author; e-mail: [matt.klukowski@mtsu.edu](mailto:matt.klukowski@mtsu.edu)

**Supplementary material**

**Table S1a.** Anterior plastron response of eastern box turtles immediately after stimulus application. See Methods for a description of the different plastron positions.

| Treatment | <i>n</i> | Fully Open | Mostly Open | Slightly Open | Fully Closed |
|-----------|----------|------------|-------------|---------------|--------------|
| Control   | 10       | 10         | 0           | 0             | 0            |
| Visual    | 10       | 8          | 1           | 1             | 0            |
| Poke      | 10       | 3          | 2           | 3             | 2            |
| Pinch     | 10       | 0          | 1           | 1             | 8            |

Flip

---

**Table S1b.** Head response of eastern box turtles immediately after stimulus application. See fig. 1 for depiction of different head positions.

---

| Treatment  | <i>n</i> | Fully | Barely | Mostly | Out    | Extended |
|------------|----------|-------|--------|--------|--------|----------|
|            |          | In    | Out    | Out    | Normal | Far      |
| Control    | 10       | 0     | 0      | 1      | 8      | 1        |
| Visual     | 10       | 3     | 7      | 0      | 0      | 0        |
| Poke       | 10       | 6     | 4      | 0      | 0      | 0        |
| Pinch Flip | 10       | 10    | 0      | 0      | 0      | 0        |

---

**Table S1c.** Front leg response of eastern box turtles immediately after stimulus application.

---

| Treatment  | <i>n</i> | Out      |            |        |
|------------|----------|----------|------------|--------|
|            |          | Fully In | Barely Out | Normal |
| Control    | 9        | 1        | 1          | 7      |
| Visual     | 10       | 4        | 1          | 5      |
| Poke       | 10       | 10       | 0          | 0      |
| Pinch Flip | 10       | 10       | 0          | 0      |

---
